# Supplementary material for: ‘Multi-SpaM’: a maximum-likelihood approach to phylogeny reconstruction using multiple spaced-word matches and quartet trees
Source: PubMed Central journal article supplement (PMC7671388; doi:10.1093/nargab/lqz013), 2019-10-30
Supplement: lqz013_supplemental_file.pdf [file lqz013_supplemental_file.pdf]

Supplementary Material for  
*Multi-SpaM: a Maximum-Likelihood  
approach to Phylogeny reconstruction using  
Multiple Spaced-Word Matches and Quartet  
Trees*

Thomas Dencker, Chris-André Leimeister, Michael Gerth,  
Christoph Bleidorn, Sagi Snir, Burkhard Morgenstern

July 31, 2019

In our paper, we describe *Multi-SpaM*, a new alignment-free approach to phylogeny reconstruction. For a given binary pattern  $P$  of length  $\ell$ , consisting of  $w$  *match positions* and  $\ell - w$  *don't-care positions*, our approach uses *quartet blocks*, defined as local, gap-free alignments of four different input sequences each, with identical nucleotides at the *match positions* of  $P$  and possible mismatches at the *don't-care positions*.  $w$  is called the *weight* of  $P$ . By default, we sample up to  $M = 1,000,000$  *quartet blocks*. The default pattern length is  $\ell = 110$ , the default number of *match positions* is  $w = 10$ , i.e. we have 100 *don't-care* positions with these default parameter values. In the following, we show the influence of the values of  $M, \ell$  and  $w$  on the results produced by *Multi-SpaM*.

Because *Multi-SpaM* uses gap-free alignments, one may think that the length  $\ell$  of these alignments might affect the output of our approach: since we can only consider homologies between *indel-free* segments of the sequences, a long pattern length  $\ell$  reduces the number of possible homologous quartet blocks that can be used by *Multi-SpaM*. It would thus be interesting to know how the total number of homologous quartet blocks depends on the pattern length. Note that the number of *quartet blocks* can be very large so, in

| weight | min. RF distance | avg. RF distance | max. RF distance |
|--------|------------------|------------------|------------------|
| 10     | 0.130            | 0.152            | 0.217            |
| 12     | 0.154            | 0.238            | 0.308            |
| 14     | 0.154            | 0.254            | 0.346            |
| 16     | 0.192            | 0.242            | 0.308            |

Table S1: Normalized Robinson-Foulds distances for different weights on the 29 *E. coli/Shigella* dataset

general, we cannot determine this number experimentally. As a proxy, we report the number of *pairwise* spaced-word matches. Figure 1 shows, how the number of pairwise spaced-word matches with positive scores depends on the length  $\ell$  of the underlying pattern. As can be seen, the number of spaced-word matches decreases with an increased pattern length  $\ell$ , but the decrease is rather moderate.

Table 1 shows the influence of the *weight* (number of *match positions*) of the underlying pattern  $P$  on the quality of the trees produced with *Multi-SpaM*, as measured by their *Robinson-Foulds* distances to reference trees. Similarly, Figure 2 shows the influence of the maximal number  $M$  of quartet blocks on the quality of the reconstructed trees, while Figure 4, shows how the length of the pattern  $P$  affects the quality of the trees.

Average number of spaced word matches for pairs of sequences

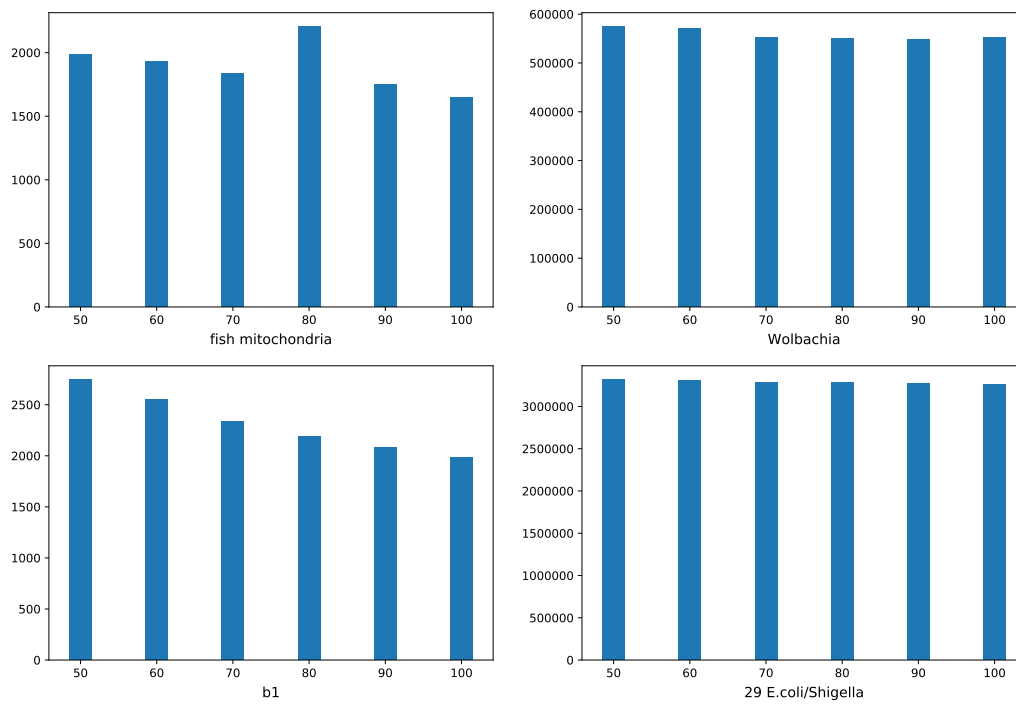

Figure S1: Number of *spaced-word* matches with positive score between different pairs of genomes for patterns  $P$  of weight  $w = 10$ , i.e. with 10 *match positions*, and with varying length. The  $x$  axis is the number of *don't-care* positions  $\ell - w$ .

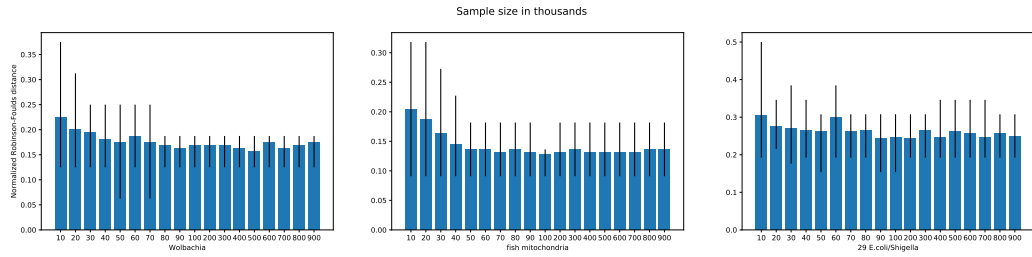

Figure S2: Average *normalized Robinson-Foulds (RF)* distances between trees calculated with *Multi-SpaM* depending on the maximal number  $M$  of sampled quartet blocks on three different data sets used in the paper: *Wolbachia*, fish mitochondrial genomes and *E. coli/shigella*. All other parameter values are default values.

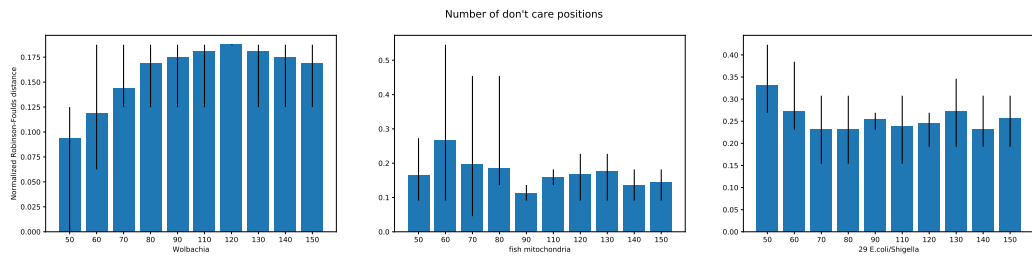

Figure S3: Average *normalized Robinson-Foulds (RF)* distances between trees calculated with *Multi-SpaM* depending on the number of *don't care* positions. All other parameter values are default values.

Simulated sequences (based on m2) with various parameter changes

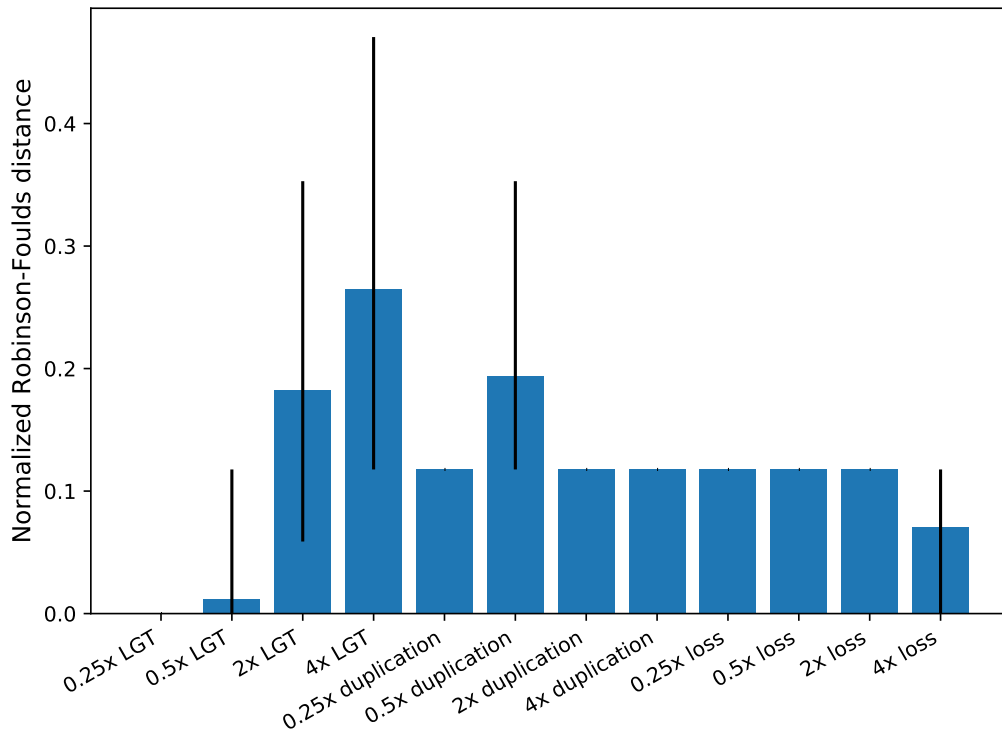

Figure S4: Average *normalized Robinson-Foulds (RF)* distances between trees calculated with *Multi-SpaM* and reference trees for different semi-artificial mammalian data sets generated with the *Artificial Life Framework (ALF)* [1]. The data sets were generated as the set *m2* described in the paper, but with different parameters for *lateral gene transfer*, *gene duplications* and *gene loss*.

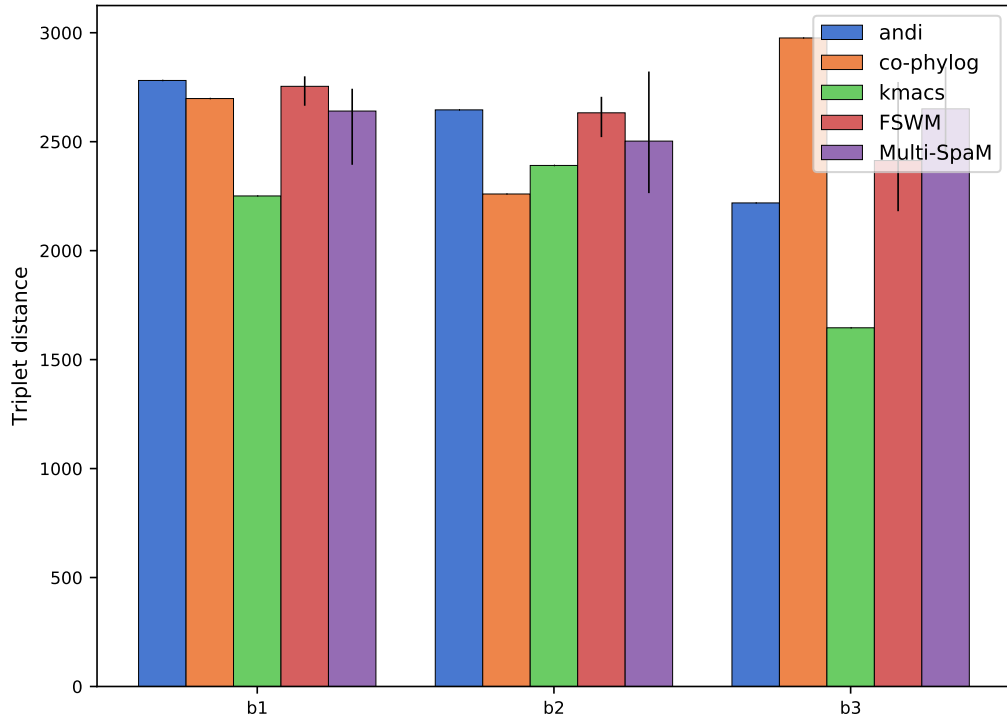

Figure S5: Average *triplet distances* calculated with *tqDist* [2] between trees calculated with alignment-free methods and reference trees for three sets of simulated bacterial genomes. Sequences were generated with the *Artificial Life Framework (ALF)* [1], see also Figure 3 in the main paper. *FSWM* and *Multi-SpaM* were run 10 times, with different patterns  $P$  generated. Error bars indicate the lowest and highest *triplet distances*, respectively.

## References

- [1] Daniel A. Dalquen, Maria Anisimova, Gaston H. Gonnet, and Christophe Dessimoz. ALF - a simulation framework for genome evolution. *Molecular Biology and Evolution*, 29:1115–1123, 2012.
- [2] Andreas Sand, Morten K. Holt, Jens Johansen, Gerth Stlting Brodal, Thomas Mailund, and Christian N. S. Pedersen. tqDist: a library for computing the quartet and triplet distances between binary or general trees. *Bioinformatics*, 30:2079–2080, 2014.
